# Supplementary material for: Use of Physiotherapy Prior to Total Knee Arthroplasty—Results of the Prospective FInGK Study
Source: MDPI journal article supplement (doi:10.3390/healthcare10020407), 2022-02-21
Supplement: s1 [file s1]

## Supplementary material

Supplementary material S1: Utilization of physiotherapy (PT) in % with 95% confidence limits (CI), stratified by sex

|                                                                                 | Female (n=143)   | Male (n=96)      | Total (n=239)    |
|---------------------------------------------------------------------------------|------------------|------------------|------------------|
| <b>At least one PT</b>                                                          | 48.3 (40.1-56.4) | 29.2 (20.1-38.3) | 40.6 (34.4-46.8) |
| <b>Therapeutic exercises, massage therapy, manual therapy, traction therapy</b> | 46.2 (38.0-54.3) | 25.9 (16.3-33.7) | 37.7 (31.5-43.8) |
| <b>Manual lymphatic drainage</b>                                                | 14.0 (8.3-19.7)  | 5.2 (0.8-9.7)    | 10.5 (6.6-14.3)  |
| <b>Electrotherapy</b>                                                           | 4.9 (1.4-8.4)    | 2.1 (0.0-4.9)    | 3.8 (1.4-6.2)    |
| <b>Thermotherapy</b>                                                            | 3.5 (0.5-6.5)    | -                | 2.1 (0.3-3.9)    |
| <b>Other</b>                                                                    | 2.8 (0.1-5.5)    | 1.0 (0.0-3.1)    | 2.1 (0.3-3.9)    |

Supplementary material S2: Mean number of physiotherapeutic treatments/sessions with standard deviation and interquartile range, stratified by sex

|                                                                                 |           | Female (n=143) | Male (n=96) | Total (n=239) |
|---------------------------------------------------------------------------------|-----------|----------------|-------------|---------------|
| <b>At least one PT</b>                                                          | Mean (SD) | 31.4 (36.6)    | 25.5 (33.2) | 29.6 (35.3)   |
|                                                                                 | IQR       | (12-36)        | (10-30)     | (12-30)       |
| <b>Therapeutic exercises, massage therapy, manual therapy, traction therapy</b> | Mean (SD) | 26.9 (30.3)    | 20.5 (19.2) | 25.1 (27.7)   |
|                                                                                 | IQR       | (10-30)        | (9.0-24)    | (10-25)       |
| <b>Manual lymphatic drainage</b>                                                | Mean (SD) | 17.9 (17.0)    | 38.5 (36.8) | 21.7 (22.2)   |
|                                                                                 | IQR       | (6-30)         | (12-65)     | (6-30)        |
| <b>Electrotherapy</b>                                                           | Mean (SD) | 5.7 (2.7)      | 16.0 (5.7)  | 8.3 (5.7)     |
|                                                                                 | IQR       | (4-6)          | (12-20)     | (5-10)        |
| <b>Thermotherapy</b>                                                            | Mean (SD) | 6.0 (0)        | -           | 6.0 (0)       |
|                                                                                 | IQR       | (6-6)          | -           | (6-6)         |
| <b>Other</b>                                                                    | Mean (SD) | 5.3 (5.0)      | 30.0 (0)    | 10.2 (11.9)   |
|                                                                                 | IQR       | (1.5-9.0)      | (30-30)     | (2-12)        |

PT=physiotherapy; SD=standard deviation; IQR=interquartile range

Treatments/sessions were determined by asking; "Did you receive PT in the last 12 months due to the impaired knee joint? How many treatments/sessions did you have? (For information: One physiotherapy prescription usually comprises 6 treatments/sessions of 20-30 minutes each)."
